# 1 Nitrate modulates stem cell dynamics 2 by regulating *WUSCHEL* expression through cytokinins

3  
4 **Authors:** Benoit Landrein<sup>1</sup>, Pau Formosa-Jordan<sup>1</sup>, Alice Malivert<sup>1</sup>, Christoph Schuster<sup>1</sup>, Charles W. Melnyk<sup>1</sup>,  
5 Weibing Yang<sup>1</sup>, Colin Turnbull<sup>2</sup>, Elliot M. Meyerowitz<sup>1,3</sup>, James C.W. Locke<sup>1</sup>, Henrik Jönsson<sup>1,4,5</sup>

6 <sup>1</sup>Sainsbury Laboratory, University of Cambridge, Bateman Street, Cambridge CB2 1LR, UK.

7 <sup>2</sup>Department of Life Sciences, Imperial College London, London SW7 2AZ, UK.

8 <sup>3</sup>Howard Hughes Medical Institute and Division of Biology and Biological Engineering, California Institute of Technology, Pasadena, CA 91125, USA.

9 <sup>4</sup>Computational Biology and Biological Physics Group, Department of Astronomy and Theoretical Physics, Lund University, S-221 00 Lund, Sweden.

10 <sup>5</sup>Department of Applied Mathematics and Theoretical Physics, University of Cambridge, Cambridge CB3 0DZ, UK.

11  
12 **Correspondence:** Henrik Jönsson, James C.W. Locke, Elliot M. Meyerowitz,

13 [henrik.jonsson@slcu.cam.ac.uk](mailto:henrik.jonsson@slcu.cam.ac.uk) (H.J.), [james.locke@slcu.cam.ac.uk](mailto:james.locke@slcu.cam.ac.uk) (J.C.W.L.), [meyerow@caltech.edu](mailto:meyerow@caltech.edu) (E.M.M.)

14 **The shoot apical meristem (SAM) is responsible for the generation of all of the aerial parts of**  
15 **plants<sup>1</sup>. Given its critical role, dynamical changes in SAM activity should play a central role in the**  
16 **adaptation of plant architecture to the environment<sup>2</sup>. Using quantitative microscopy, grafting**  
17 **experiments and genetic perturbations, we connect the plant environment to the SAM, by**  
18 **describing the molecular mechanism by which cytokinins signal the level of nutrient availability to**  
19 **the SAM. We show that a systemic signal of cytokinin precursors<sup>3</sup> mediates the adaptation of SAM**  
20 **size and organogenesis rate to the availability of mineral nutrients by modulating the expression**  
21 **of *WUSCHEL*, a key regulator of stem cell homeostasis<sup>4</sup>. In time-lapse experiments, we further**  
22 **show that this mechanism allows meristems to adapt to rapid changes in nitrate concentration,**  
23 **and thereby modulate their rate of organ production to the availability of mineral nutrients within**  
24 **a few days. Our work sheds new light on the role of the stem cell regulatory network, by showing**  
25 **that it does not only maintain meristem homeostasis but also allows plants to adapt to rapid**  
26 **changes in the environment.**

27 Plants have evolved specific mechanisms to adapt their growth and physiology to the availability of  
28 mineral nutrients in their environment<sup>5</sup>. Various hormones such as auxin, abscisic acid, gibberellin  
29 and cytokinins have been shown to act in this process either locally or systemically<sup>5</sup>. Cytokinins in  
30 particular play an essential role in plant response to nitrate, where they act as second messengers<sup>6</sup>.  
31 For example, cytokinins promote lateral root development in areas rich in NO<sub>3</sub> if the overall NO<sub>3</sub>  
32 availability for the plant is low<sup>7</sup>. In the shoot, cytokinins have been shown to modulate key traits  
33 such as leaf size<sup>8,9</sup> and branch number<sup>10</sup> in response to nitrate.

34 Cytokinins have also been shown to be critical for the maintenance of stem cell homeostasis in the  
35 SAM. By modulating the expression of *WUSCHEL*, a homeodomain transcription factor expressed in  
36 the center of the meristem, cytokinins promote stem cell proliferation, thus controlling the size of  
37 the meristem and the rate of shoot organogenesis<sup>11-14</sup>. Using grafting experiments, a recent study  
38 showed that a systemic signal of a cytokinin precursor (trans-zeatin-riboside: tZR), travelling from  
39 root to shoot through xylem, could influence the size of the vegetative meristem<sup>3</sup>. However, it  
40 remains unclear whether cytokinin signalling can allow the SAM to respond to changes in nutrient  
41 levels in the environment. Here, we examined how a core stem cell regulator in the SAM dynamically  
42 responds to changes in mineral nutrient levels in the soil and whether systemic cytokinin signals can  
43 account for the dynamic adaptation of meristem function to nutrient levels. We used the  
44 inflorescence meristem of *Arabidopsis* as a model as this structure produces all of the flowers of the  
45 plant and is therefore a key target for crop improvement.

46

47 We first studied how fixed levels of nutrients affect meristem function, by growing plants on soil  
48 containing different levels of nutrients. To assess meristem function, we measured the size of the  
49 meristem, the plastochron ratio (a feature that is inversely proportional to the organogenesis rate of  
50 the SAM) and the number of flowers produced by the primary inflorescence (Methods). We  
51 observed that bigger, well-nourished plants had larger meristems and produced more flowers than  
52 smaller, more poorly nourished plants (Fig. 1a, Supplementary Fig. 1). We found a very close  
53 correlation between the weight of the rosette and the size of the meristem in individual plants  
54 (Fig.1b), showing that shoot development is coordinated when plants are grown under different  
55 nutritional conditions.

56

57 We next examined whether the observed changes in meristem size were linked to changes in stem  
58 cell homeostasis, by examining fluorescent reporters for the key meristem regulatory genes, *WUS*  
59 and *CLAVATA3* (*CLV3*). We developed a pipeline based on projections of 3D confocal stacks to  
60 automatically extract and analyse gene expression domains using a generalized exponential fit  
61 function (Methods, Supplementary Fig. 2). The intensity of the signal and the size of the domain of  
62 expression of *pWUS::GFP* were strongly correlated with the size of the SAM in the different growth  
63 conditions (Fig. 1c, Supplementary Fig. 3a and b), which was also confirmed using a translational  
64 fusion (Supplementary Fig. 3c). *CLV3* did not show such behaviour in all experimental repeats and  
65 only the size of its expression domain consistently correlated weakly with the size of the SAM  
66 (Supplementary Fig. 3d). Such an uncoupling between *WUS* and *CLV3* expression has been described  
67 in vegetative meristems under different light levels<sup>15</sup> and suggests that these two genes could be  
68 differentially regulated by both nutrients and light.

69

70 As cytokinins modulate *WUS* and *CLV3* expression<sup>11-13</sup>, we examined the expression of *pTCSn::GFP*, a  
71 reporter of cytokinin response, when plants were grown with different levels of nutrients. Similarly  
72 to what was observed with *WUS*, the intensity of the signal and the size of the domain of expression  
73 of the *pTCSn::GFP* reporter correlated with the size of the meristem in the different growth  
74 conditions (Fig. 1d, Supplementary Fig. 3e and f), thus showing that plants growing with higher levels  
75 of nutrients exhibit higher levels of cytokinin signalling in the SAM. As altering cytokinin signalling is  
76 known to affect meristem homeostasis<sup>16-21</sup>, we further studied the phenotype in the meristem of  
77 various mutants of cytokinin metabolism and their response to mineral nutrition.

78 First, we looked at the phenotype of mutants altered in the successive steps of production of  
79 cytokinins<sup>22</sup>: *ipt3-1 ipt5-2 ipt7-1* (referred to here as *ipt3.5.7*) for the first step of biosynthesis, *log4-3*  
80 *log7-1* (*log4.7*) and *log1-2 log3-2 log4-3 log7-1* (*log1.3.4.7*) for the second step of biosynthesis and  
81 for mutants for the conversion of cytokinins<sup>23</sup>: *cyp735a1-1 cyp735a2-1* (*cyp735a1.2*) and the  
82 degradation of cytokinins<sup>16</sup>: *ckx3-1 ckx5-2* (*ckx3.5*) in plants grown on soil supplied with fertilizer.  
83 Mutant shoots grew almost normally in this condition and only the *ipt3.5.7* and *cyp735a1.2* mutants  
84 showed a slight decrease in rosette weight (Fig. 2a and Supplementary Fig. 4a). However, meristem  
85 size and organogenesis rate were strongly affected by the mutations (Fig. 2b and c, Supplementary  
86 Fig. 4b-d). The *ipt3.5.7*, *log4.7*, *log1.3.4.7* and *cyp735a1.2* mutants, altered in various steps of tZ  
87 production, showed smaller inflorescence meristems that produced fewer organs. In contrast, the  
88 *ckx3.5* mutant, which displays higher levels of cytokinins, showed larger inflorescence meristems  
89 that produced more organs, as previously described<sup>16</sup>. We also quantified the size of the domain of

90 expression of *WUS* by *in situ* hybridization (Supplementary Fig. 4e). We observed changes in the size  
91 of the *WUS* expression domain in all genotypes that correlated with the changes in meristem size we  
92 quantified, thus supporting the idea that cytokinin metabolism controls meristem function through  
93 the stem cell regulatory network.

94 We next looked at the effect of mineral nutrition on the phenotype of the mutants by comparing  
95 plants grown on soil with or without fertilizer. Of all mutants, only *ipt3.5.7* mutants did not respond  
96 to fertilizer with an increase in meristem size and organogenesis rate, as observed in WT. Instead, it  
97 displayed a surprising statistically significant decrease in meristem size (Fig. 2b and c). Although all  
98 the enzymes involved in cytokinin metabolism can modulate meristem homeostasis, *ISOPENTENYL-*  
99 *TRANSFERASE* enzymes (*IPT*), which catalyse the first step of cytokinin production, appear to be the  
100 only ones necessary for the response of the meristem to changes in nutrient availability in the soil.  
101 This result is supported by the fact that nitrate, the main mineral nutrient, can directly modulate the  
102 expression of *IPT3* and to a lesser extent of *IPT5* in seedlings<sup>24</sup>. To further support that the response  
103 of meristems to mineral nutrients relies on cytokinin precursors produced by *IPT* enzymes, we used  
104 mass spectrometry to compare CK levels in inflorescences of plants grown without or with fertilizer.  
105 Despite technical variability in the mass spectrometry measurements, we observed a statistically  
106 significant increase in the levels of tZR precursors, the dephosphorylated products of *IPT* enzymes, in  
107 the two experimental replicates, further supporting the importance of these enzymes in the  
108 response of the meristem to nutrients (Supplementary Fig. 5f). We did not find significant changes in  
109 the levels of the active cytokinin tZ in the whole inflorescence but found a significant increase in the  
110 levels of the degradation products of tZ: tZROG (trans-zeatin ribose-O-glucose) and tZ7G (trans-  
111 zeatin-7-glucose). The lack of changes in tZ levels could be a result of tZ being a transient molecule  
112 mainly synthesized locally in the meristem, notably through the action of *LOG4* and *LOG7* enzymes<sup>11-</sup>  
113 <sup>13</sup>.

114 We further studied the spatial origin of the signal triggering the response of the meristem to mineral  
115 nutrition. Grafting experiments have previously shown that cytokinins can act either as local or as  
116 systemic signals in the control of root and shoot development<sup>3,23,25</sup>. We performed grafting  
117 experiments on our set of mutants to study whether a systemic signal is involved in the control of  
118 meristem function. Adding a WT root was able to rescue the phenotype in the meristem of *ipt3.5.7*  
119 and *cyp735a1.2* mutants but not of the *ckx3.5* and of the two *log* mutants (Fig. 3a and b,  
120 Supplementary Fig. 5a). Grafting a mutant root onto a WT scion led to a minor but statistically  
121 significant decrease in meristem size for *log1.3.4.7*, *ipt3.5.7* and *cyp735a1.2* mutant roots  
122 (Supplementary Fig. 5b-d). These experiments show that expressing *IPT* and *CYP735A* in either part  
123 of the plant is sufficient but not completely necessary for proper meristem function, but that *LOG*  
124 and *CKX* must act largely in the shoot to regulate meristem function. Our results are in agreement  
125 with the recent work by Osugi and colleagues, who showed that the phenotype in the vegetative  
126 meristem of the *ipt* triple mutant but not the *log* sextuple mutant could be complemented by  
127 grafting a WT root<sup>3</sup>. These results also make sense in light of the expression patterns of the different  
128 genes, as *LOG* and *CKX* enzymes are expressed in meristems<sup>11,13,16</sup>, while *IPTs* and *CYP735a1-2* are  
129 expressed predominantly in the vascular tissues of the root and to a lesser extent of the shoot<sup>19,26</sup> -  
130 only *IPT7* expression has been shown to be induced by *STM* in the vegetative meristem<sup>27</sup>.

131 To analyse the dynamics between production of cytokinin precursors and modulation of meristem  
132 function, we applied tZR and tZ to meristems expressing *pTCSn::GFP* and *pWUS::GFP* cut from the

133 plant and grown *in vitro* (see Methods). In the absence of added cytokinin, both *pTCSn::GFP* and  
134 *pWUS::GFP* signal strongly decreased over a 48h time course, suggesting that extrinsic cytokinin is  
135 needed to sustain meristem homeostasis. In contrast, adding 50  $\mu$ M either of tZR or tZ to the  
136 medium upregulated *pTCSn::GFP* expression ectopically and allowed the maintenance of the  
137 *pWUS::GFP* signal in the centre of the meristem (Fig. 3c and d). Inducing *IPT3* in cut meristems in the  
138 absence of extrinsic cytokinin also maintained, at least partially, *WUS* expression (Supplementary  
139 Fig. 6). Together with the results from the grafting experiments, these data support a model where  
140 stem cell homeostasis is controlled by a systemic signal of cytokinin precursors (tZR) produced by *IPT*  
141 enzymes outside of the meristem, which are locally converted to active cytokinins by *LOG* enzymes  
142 in the shoot meristem.

143

144 Adding nitrate ( $\text{NO}_3$ ) to nitrogen-deficient plants leads to a rapid increase in cytokinin levels in the  
145 plant<sup>3,24,28,29</sup>. Given the rapid response of meristems to changes in cytokinin levels we observed *in*  
146 *vitro*, we looked to see if the meristem could dynamically respond to changes in nitrate  
147 concentration *in vivo*. We grew plants on sand, watering them with a nutritive solution containing a  
148 low concentration of nitrate (1.8 mM of  $\text{NO}_3$  as the only source of nitrogen) to induce a deficiency<sup>10</sup>.  
149 Once the plants bolted, we watered them with a nutritive solution containing different  
150 concentrations of  $\text{NO}_3$  (0 mM, 1.8 mM or 9mM) and quantitatively analysed the dynamics of  
151 response to this treatment. In the SAM, the treatment led to the dose-dependent induction of  
152 *pTCSn::GFP* and of *pWUS::GFP* expression within only one day and to an increase of meristem size  
153 and of the organogenesis rate within 2 to 3 days (Fig. 4a-c, Supplementary Fig. 7). We then checked  
154 whether this response relied on changes in cytokinin levels in the plant. In the root, we confirmed  
155 that the addition of nitrate to deficient plants led to a rapid, dose-dependent and transient induction  
156 of nitrate signalling (inferred from the level of expression of the nitrate responsive gene *NIA1*) and of  
157 *IPT3* and 5 (Supplementary Fig. 8a). By measuring the levels of cytokinin species by mass  
158 spectrometry, we also confirmed that the treatment led to a significant increase in the  
159 concentration of cytokinin precursors (tZR and/or tZRP depending on the tissues) and products of  
160 degradation (tZ7G, tZ9G, and/or tZROG depending on the tissues, Supplementary Fig. 8b). Finally, we  
161 analysed the meristem response in our set of mutants, three days after a nitrate treatment (9 mM  
162  $\text{NO}_3$ ). Similar to what we observed on plants grown in soil, the response of *ipt3.5.7* mutant plants to  
163 nitrate in the meristem was strongly reduced, though statistically significant in one of the two  
164 experimental repeats, while response in the other mutant backgrounds was as in wild type (Fig. 4d,  
165 supplementary Fig. 9). In summary, our data show that the addition of nutrients leads to a response  
166 of the stem cell regulatory network within a day and that the rapid changes in meristem properties  
167 can be explained by the same cytokinin-based mechanism of signal propagation as we found for  
168 different fixed nutrient conditions (Fig. 2).

169

170 Taken together, our results show that the meristem can adapt the rate of shoot organogenesis to  
171 the availability of nitrate in the soil. Mechanistically, this phenomenon correlates with the ability of  
172 *WUS* to quantitatively respond to changes in the concentration of cytokinin precursors produced in  
173 the plant in response to variations in nitrate levels. As the main inflorescence of WT plants growing  
174 on soil only produced an average of  $3.1 \pm 0.4$  flowers per day (n=16), the response of the SAM to  
175 changes in nitrate levels, which leads to significant changes in the rate of organ production in only  
176 two days, should be seen as very rapid in comparison to the pace of morphogenesis in this tissue.  
177 The timing of the response to nutrients is very similar to the response to induced perturbations of

178 the core network<sup>30</sup>, in both cases causing expression domain changes in a day followed by changes in  
179 growth and size. Our findings thus expand the understanding of the function of the stem cell  
180 regulatory network in the SAM. They show that this network not only acts to maintain the integrity  
181 of the SAM during organogenesis, but also allows a very rapid adaptation of SAM function to a  
182 nutritional cue.

183

184 A recent study showed that vegetative meristems of seedlings germinating in the dark displayed  
185 reduced *WUS* expression, which was controlled by the activity of *CKX* enzymes<sup>15</sup>. Given the  
186 pleiotropic effects of cytokinins<sup>6</sup>, we can hypothesize that different environmental signals could be  
187 integrated through cytokinin signalling, and lead to different developmental responses in the  
188 meristem depending on whether they modulate, locally or globally, different aspects of cytokinin  
189 signalling.

190

191 Although it was developed in *Arabidopsis*, this model can in future be applied to crops, where  
192 cytokinin metabolism and action on stem cell regulation should be conserved. In rice, where *LOG*  
193 mutants were first characterized<sup>18</sup>, quantitative trait loci (QTL) for increased grain productivity have  
194 been mapped to genes involved in the regulation of cytokinins, including notably a *CKX* enzyme-  
195 encoding gene<sup>31,32</sup>. In maize, weak mutants of *FASCIATED-EAR3*, a receptor able to bind a *CLV3*  
196 homolog and involved in the control of *WUS* expression, also shows increased seed yield<sup>33</sup>. Our  
197 work, which provides a novel and integrative model based on nutrient availability, cytokinin  
198 metabolism and its effect on stem cell regulation and meristem function ([Supplementary Fig. 10](#)),  
199 allows a better characterization of the influence of mineral nutrients on plant architecture and could  
200 be used to better understand plant response to environmental inputs, and to develop new cultivars  
201 with increased yield.

202

#### 203 **Author Contributions:**

204 B.L., C.W.M., E.M.M., J.C.W.L. and H.J. designed the experiments. B.L., A.M., C.W.M., C.S., W.Y.  
205 performed the experiments. B.L., P.F.-J., A.M., C.S. and C.T. analysed the data. B.L., E.M.M., J.C.W.L.  
206 and H.J. wrote the paper with inputs from all co-authors.

207

#### 208 **Acknowledgments:**

209 This work is supported by the Gatsby Charitable Trust (through fellowship GAT3395/DAA to E.M.M.,  
210 GAT3272/GLC to J.C.W.L. and GAT3395-PR4 for H.J.). E.M.M. also acknowledges support from the  
211 Howard Hughes Medical Institute and the Gordon and Betty Moore Foundation (through grant  
212 GBMF3406). P.F.-J. acknowledges a postdoctoral fellowship provided by the Herchel Smith  
213 Foundation. We thank Tanya Waldie and Maaïke de Jong for sharing their knowledge on  
214 developmental plasticity and for help with the transient nitrate treatments, Jeremy Gruel for fruitful  
215 discussions on stem cell regulation, Paul Tarr for providing material and advice and Hugo Tavares for  
216 help with statistical analysis. We also thank Chillie Zeng, Mark Bennett and Rosa Lopez-Cobolla for  
217 their help during the preparation and the analysis of cytokinin species by mass spectrometry.

218

#### 219 **Competing interests:**

220 The authors declare the absence of any competing interest.

221

- 222 1 Barton, M. K. Twenty years on: the inner workings of the shoot apical meristem, a  
223 developmental dynamo. *Dev Biol* **341**, 95-113, doi:10.1016/j.ydbio.2009.11.029 (2010).
- 224 2 Pfeiffer, A., Wenzl, C. & Lohmann, J. U. Beyond flexibility: controlling stem cells in an ever  
225 changing environment. *Curr Opin Plant Biol* **35**, 117-123, doi:10.1016/j.pbi.2016.11.014  
226 (2017).
- 227 3 Osugi, A. *et al.* Systemic transport of trans-zeatin and its precursor have differing roles in  
228 Arabidopsis shoots. *Nat Plants* **3**, 17112, doi:10.1038/nplants.2017.112 (2017).
- 229 4 Laux, T., Mayer, K. F., Berger, J. & Jurgens, G. The WUSCHEL gene is required for shoot and  
230 floral meristem integrity in Arabidopsis. *Development* **122**, 87-96 (1996).
- 231 5 Krouk, G. *et al.* A framework integrating plant growth with hormones and nutrients. *Trends*  
232 *Plant Sci* **16**, 178-182, doi:10.1016/j.tplants.2011.02.004 (2011).
- 233 6 Werner, T. & Schmulling, T. Cytokinin action in plant development. *Curr Opin Plant Biol* **12**,  
234 527-538, doi:10.1016/j.pbi.2009.07.002 (2009).
- 235 7 Ruffel, S. *et al.* Nitrogen economics of root foraging: transitive closure of the nitrate-  
236 cytokinin relay and distinct systemic signaling for N supply vs. demand. *Proc Natl Acad Sci U*  
237 *S A* **108**, 18524-18529, doi:10.1073/pnas.1108684108 (2011).
- 238 8 Rahayu, Y. S. *et al.* Root-derived cytokinins as long-distance signals for NO<sub>3</sub><sup>-</sup>-induced  
239 stimulation of leaf growth. *J Exp Bot* **56**, 1143-1152, doi:10.1093/jxb/eri107 (2005).
- 240 9 Walch-Liu, P., Neumann, G., Bangerth, F. & Engels, C. Rapid effects of nitrogen form on leaf  
241 morphogenesis in tobacco. *J Exp Bot* **51**, 227-237 (2000).
- 242 10 Muller, D. *et al.* Cytokinin is required for escape but not release from auxin mediated apical  
243 dominance. *Plant J* **82**, 874-886, doi:10.1111/tpj.12862 (2015).
- 244 11 Chickarmane, V. S., Gordon, S. P., Tarr, P. T., Heisler, M. G. & Meyerowitz, E. M. Cytokinin  
245 signaling as a positional cue for patterning the apical-basal axis of the growing Arabidopsis  
246 shoot meristem. *Proc Natl Acad Sci U S A* **109**, 4002-4007, doi:10.1073/pnas.1200636109  
247 (2012).
- 248 12 Gordon, S. P., Chickarmane, V. S., Ohno, C. & Meyerowitz, E. M. Multiple feedback loops  
249 through cytokinin signaling control stem cell number within the Arabidopsis shoot meristem.  
250 *Proc Natl Acad Sci U S A* **106**, 16529-16534, doi:10.1073/pnas.0908122106 (2009).
- 251 13 Gruel, J. *et al.* An epidermis-driven mechanism positions and scales stem cell niches in  
252 plants. *Sci Adv* **2**, e1500989, doi:10.1126/sciadv.1500989 (2016).
- 253 14 Landrein, B. *et al.* Meristem size contributes to the robustness of phyllotaxis in Arabidopsis. *J*  
254 *Exp Bot* **66**, 1317-1324, doi:10.1093/jxb/eru482 (2015).
- 255 15 Pfeiffer, A. *et al.* Integration of light and metabolic signals for stem cell activation at the  
256 shoot apical meristem. *Elife* **5**, doi:10.7554/eLife.17023 (2016).
- 257 16 Bartrina, I., Otto, E., Strnad, M., Werner, T. & Schmulling, T. Cytokinin regulates the activity  
258 of reproductive meristems, flower organ size, ovule formation, and thus seed yield in  
259 Arabidopsis thaliana. *Plant Cell* **23**, 69-80, doi:10.1105/tpc.110.079079 (2011).
- 260 17 Higuchi, M. *et al.* In planta functions of the Arabidopsis cytokinin receptor family. *Proc Natl*  
261 *Acad Sci U S A* **101**, 8821-8826, doi:10.1073/pnas.0402887101 (2004).
- 262 18 Kurakawa, T. *et al.* Direct control of shoot meristem activity by a cytokinin-activating  
263 enzyme. *Nature* **445**, 652-655, doi:10.1038/nature05504 (2007).
- 264 19 Miyawaki, K. *et al.* Roles of Arabidopsis ATP/ADP isopentenyltransferases and tRNA  
265 isopentenyltransferases in cytokinin biosynthesis. *Proc Natl Acad Sci U S A* **103**, 16598-  
266 16603, doi:10.1073/pnas.0603522103 (2006).
- 267 20 Nishiyama, R. *et al.* Analysis of cytokinin mutants and regulation of cytokinin metabolic  
268 genes reveals important regulatory roles of cytokinins in drought, salt and abscisic acid  
269 responses, and abscisic acid biosynthesis. *Plant Cell* **23**, 2169-2183,  
270 doi:10.1105/tpc.111.087395 (2011).

- 271 21 Werner, T. *et al.* Cytokinin-deficient transgenic Arabidopsis plants show multiple  
272 developmental alterations indicating opposite functions of cytokinins in the regulation of  
273 shoot and root meristem activity. *Plant Cell* **15**, 2532-2550, doi:10.1105/tpc.014928 (2003).
- 274 22 Kieber, J. J. & Schaller, G. E. Cytokinins. *Arabidopsis Book* **12**, e0168, doi:10.1199/tab.0168  
275 (2014).
- 276 23 Kiba, T., Takei, K., Kojima, M. & Sakakibara, H. Side-chain modification of cytokinins controls  
277 shoot growth in Arabidopsis. *Dev Cell* **27**, 452-461, doi:10.1016/j.devcel.2013.10.004 (2013).
- 278 24 Takei, K. *et al.* AtIPT3 is a key determinant of nitrate-dependent cytokinin biosynthesis in  
279 Arabidopsis. *Plant Cell Physiol* **45**, 1053-1062, doi:10.1093/pcp/pch119 (2004).
- 280 25 Matsumoto-Kitano, M. *et al.* Cytokinins are central regulators of cambial activity. *Proc Natl*  
281 *Acad Sci U S A* **105**, 20027-20031, doi:10.1073/pnas.0805619105 (2008).
- 282 26 Miyawaki, K., Matsumoto-Kitano, M. & Kakimoto, T. Expression of cytokinin biosynthetic  
283 isopentenyltransferase genes in Arabidopsis: tissue specificity and regulation by auxin,  
284 cytokinin, and nitrate. *Plant J* **37**, 128-138 (2004).
- 285 27 Yanai, O. *et al.* Arabidopsis KNOX1 proteins activate cytokinin biosynthesis. *Curr Biol* **15**,  
286 1566-1571, doi:10.1016/j.cub.2005.07.060 (2005).
- 287 28 Takei, K., Sakakibara, H., Taniguchi, M. & Sugiyama, T. Nitrogen-dependent accumulation of  
288 cytokinins in root and the translocation to leaf: implication of cytokinin species that induces  
289 gene expression of maize response regulator. *Plant Cell Physiol* **42**, 85-93 (2001).
- 290 29 Peterson, J. B. & Miller, C. O. Cytokinins in *Vinca rosea* L. Crown Gall Tumor Tissue as  
291 Influenced by Compounds Containing Reduced Nitrogen. *Plant Physiol* **57**, 393-399 (1976).
- 292 30 Reddy, G. V. & Meyerowitz, E. M. Stem-cell homeostasis and growth dynamics can be  
293 uncoupled in the Arabidopsis shoot apex. *Science* **310**, 663-667,  
294 doi:10.1126/science.1116261 (2005).
- 295 31 Ashikari, M. *et al.* Cytokinin oxidase regulates rice grain production. *Science* **309**, 741-745,  
296 doi:10.1126/science.1113373 (2005).
- 297 32 Wu, Y. *et al.* The QTL GNP1 Encodes GA20ox1, Which Increases Grain Number and Yield by  
298 Increasing Cytokinin Activity in Rice Panicle Meristems. *PLoS Genet* **12**, e1006386,  
299 doi:10.1371/journal.pgen.1006386 (2016).
- 300 33 Je, B. I. *et al.* Signaling from maize organ primordia via FASCIATED EAR3 regulates stem cell  
301 proliferation and yield traits. *Nat Genet* **48**, 785-791, doi:10.1038/ng.3567 (2016).

## **Main figures:**

### **Fig. 1 Plant nutritional status influences shoot meristem homeostasis.**

a. Morphology of the rosette (top, scale bar: 1 cm) and of the SAM (bottom, scale bar: 50  $\mu$ m) of representative WT plants grown on soils of different nutritive quality. b. Correlation between rosette weight and SAM size of WT plants grown on soils of different nutritive quality (n=109, pool of 2 independent experiments). c. and d. *pWUS::GFP* (c) and *pTCSn::GFP* (d) expression in WT plants grown on soils of different nutritive quality (scale bars: 50  $\mu$ m, n=55 (c) and n=57 (d)). Top panels show representative plants. Red arrows point to the center of the inflorescence meristem. The lower panels show total fluorescent signal (Methods) in the inflorescence meristem vs. meristem size. Data were fitted using linear models.

### **Fig. 2 Cytokinins allow the adaptation of meristem function to plant nutritional status**

a. Morphology of the rosette (top, scale bar: 1 cm) and of the SAM (bottom, scale bar: 50  $\mu$ m) of representative WT and CK-associated mutant plants. b. and c. Meristem size (b) and plastochron ratio (c) of WT and CK-associated mutant plants grown on soil without (green, g) or with fertilizer (red, r) (Col-0: n= 22 (g) and 25 (r), *ckx3.5*: n= 23 (g) and 27 (r), *log4.7*: n= 19 (g) and 24 (r), *log1.3.4.7*: n= 14 (g) and 25 (r), *ipt3.5.7*: n= 36 (g) and 20 (r), *cyp735a1.2*: n= 26 (g) and 20 (r), pool of 2 independent experiments). Data were compared using Student's t-test.

### **Fig. 3 Cytokinin precursors act as long-range signals in the control of SAM homeostasis**

a. Representative meristems of WT and cytokinin-associated mutant plants self-grafted or grafted with a WT rootstock and grown on soil supplied with fertilizer (Scale bar: 50  $\mu$ m). b. Meristem size of WT and cytokinin-associated mutant plants self-grafted or grafted with a WT rootstock and grown on soil supplied with fertilizer (pools of two independent experiments, the numbers of replicates are displayed in the figure). Data were compared using Student's t-tests. c. and d. Effect of tZR and tZ application on the expression of *pTCSn::GFP* (c) and *pWUS::GFP* (d) in cut meristems grown *in vitro* (scale bars: 50  $\mu$ m, pools of two independent experiments, *pTCSn::GFP*: n=11 for each condition, *pWUS::GFP*: n=12 for each condition). Top panels show representative plants. Red arrows point to the center of the inflorescence meristem. Lower panels show total fluorescent signal in the inflorescence meristem (Methods). Data were compared using Student's t-test.

### **Fig. 4 Nitrate modulates meristem homeostasis through IPTs**

a. to c. Effect of nitrate resupply on *pTCSn::GFP* expression (a), *pWUS::GFP* expression (b), and meristem size and plastochron ratio (c). The treatment was performed at day 0 and different meristems were dissected and imaged each day (Scale bars: 50  $\mu$ m, n=8 to 12). (a and b) Left panels show representative plants, and right panels show quantification of total fluorescent signal (Methods). Red arrows point to the center of the inflorescence meristem. Data were compared using Student's t-test. d. Meristem size and plastochron ratio of WT and cytokinin-associated mutants three days after treatment with a nutritive solution containing either 0 mM (green, g) or 9 mM of NO<sub>3</sub> (red, r) (Col-0: n= 21 (g) and 24 (r), *ckx3.5*: n= 13 (g) and 12 (r), *log4.7*: n= 17 (g) and 18 (r), *log1.3.4.7*: n= 13 (g) and 15 (r), *ipt3.5.7*: n= 18 (g) and 19 (r), *cyp735a1.2*: n= 14 (g) and 14 (r)). Data were compared using Student's t-test.



a

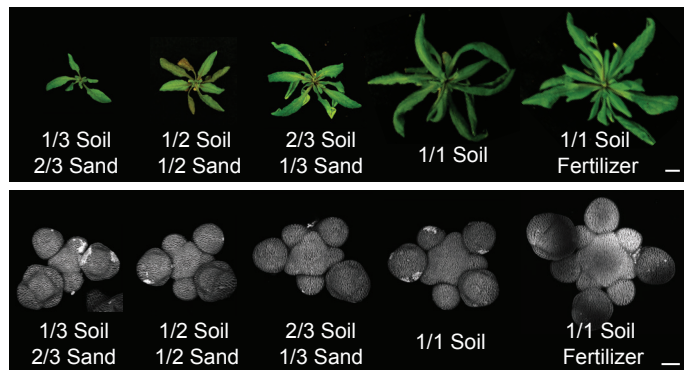

b

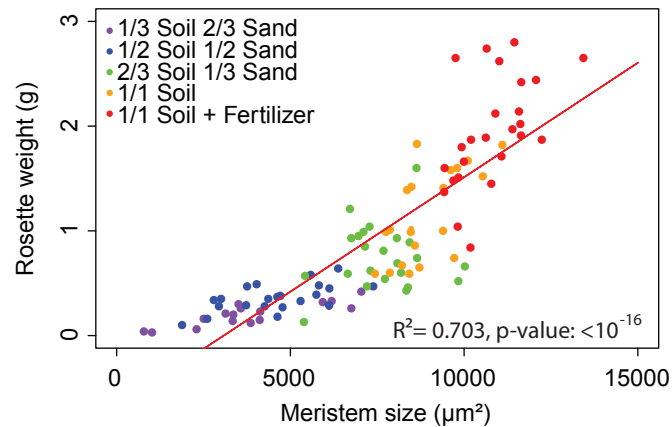

c

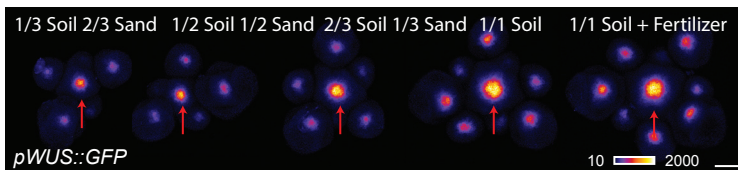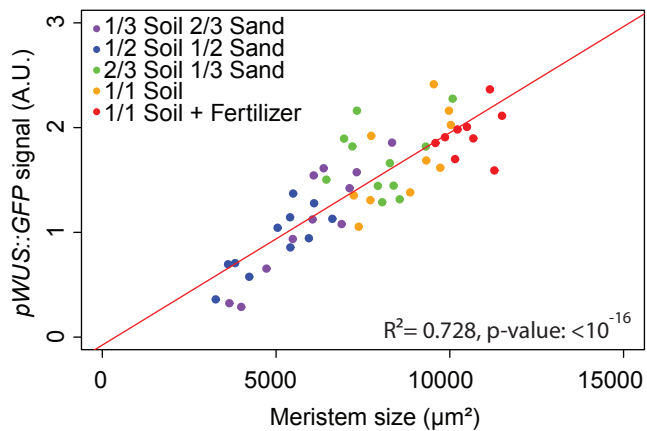

d

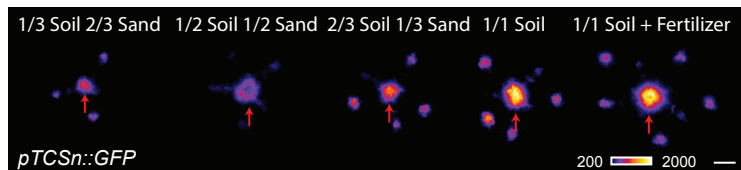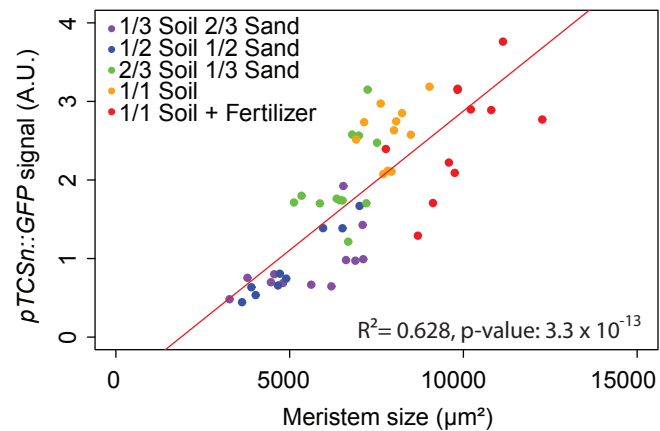

a

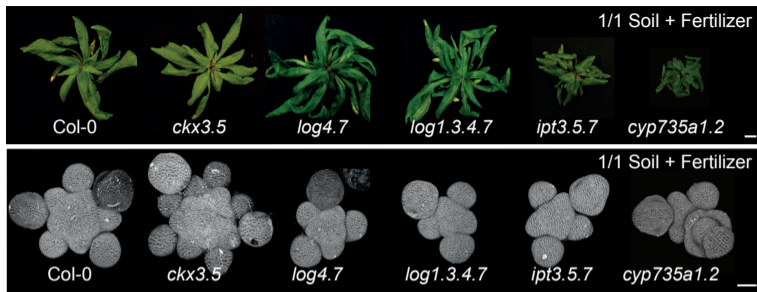

b

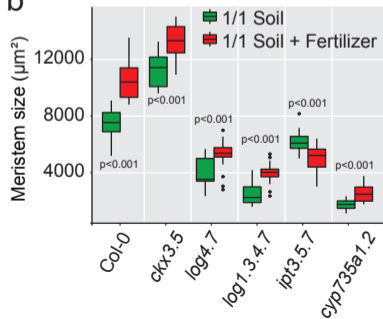

c

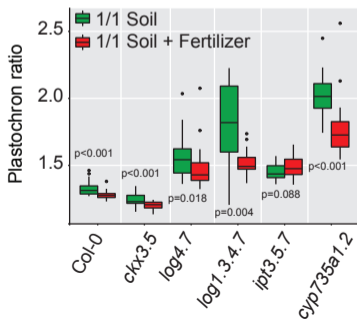

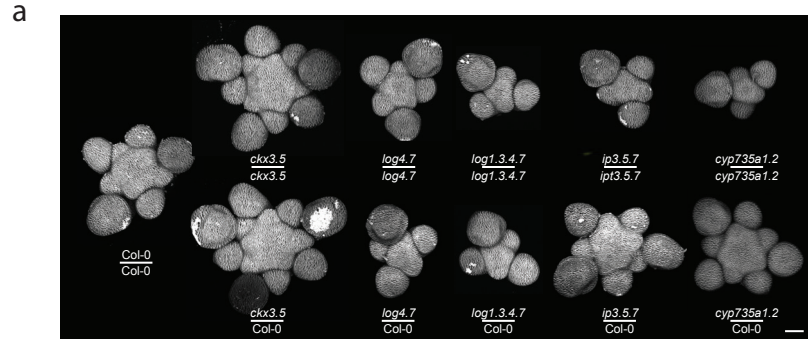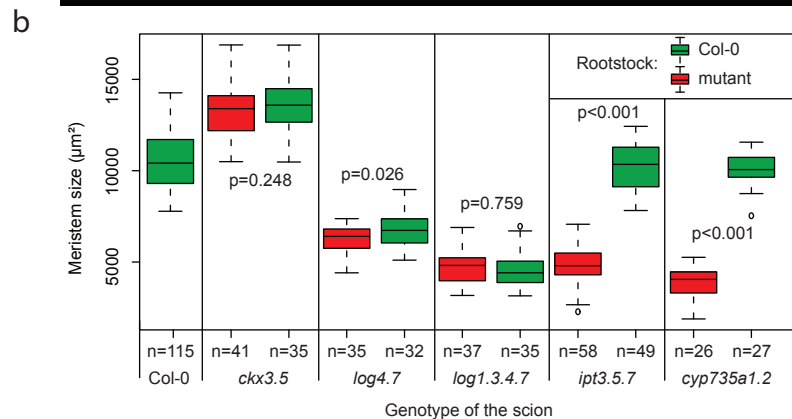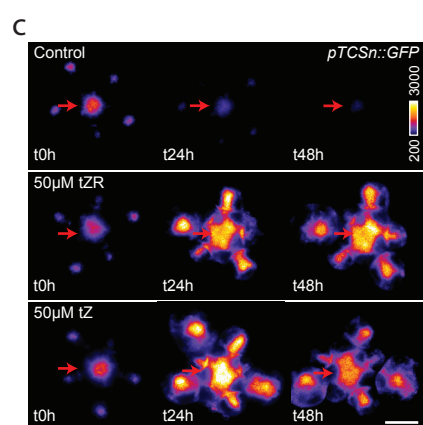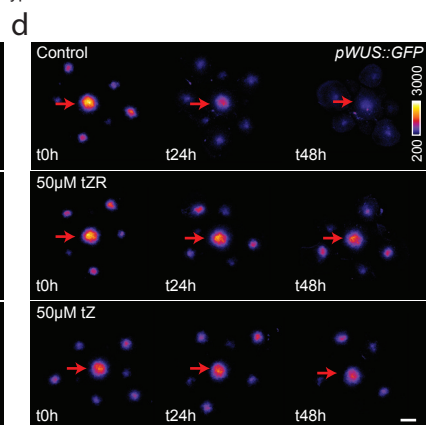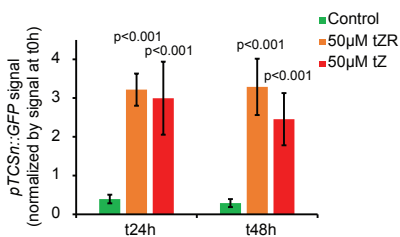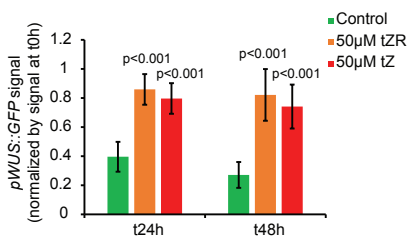

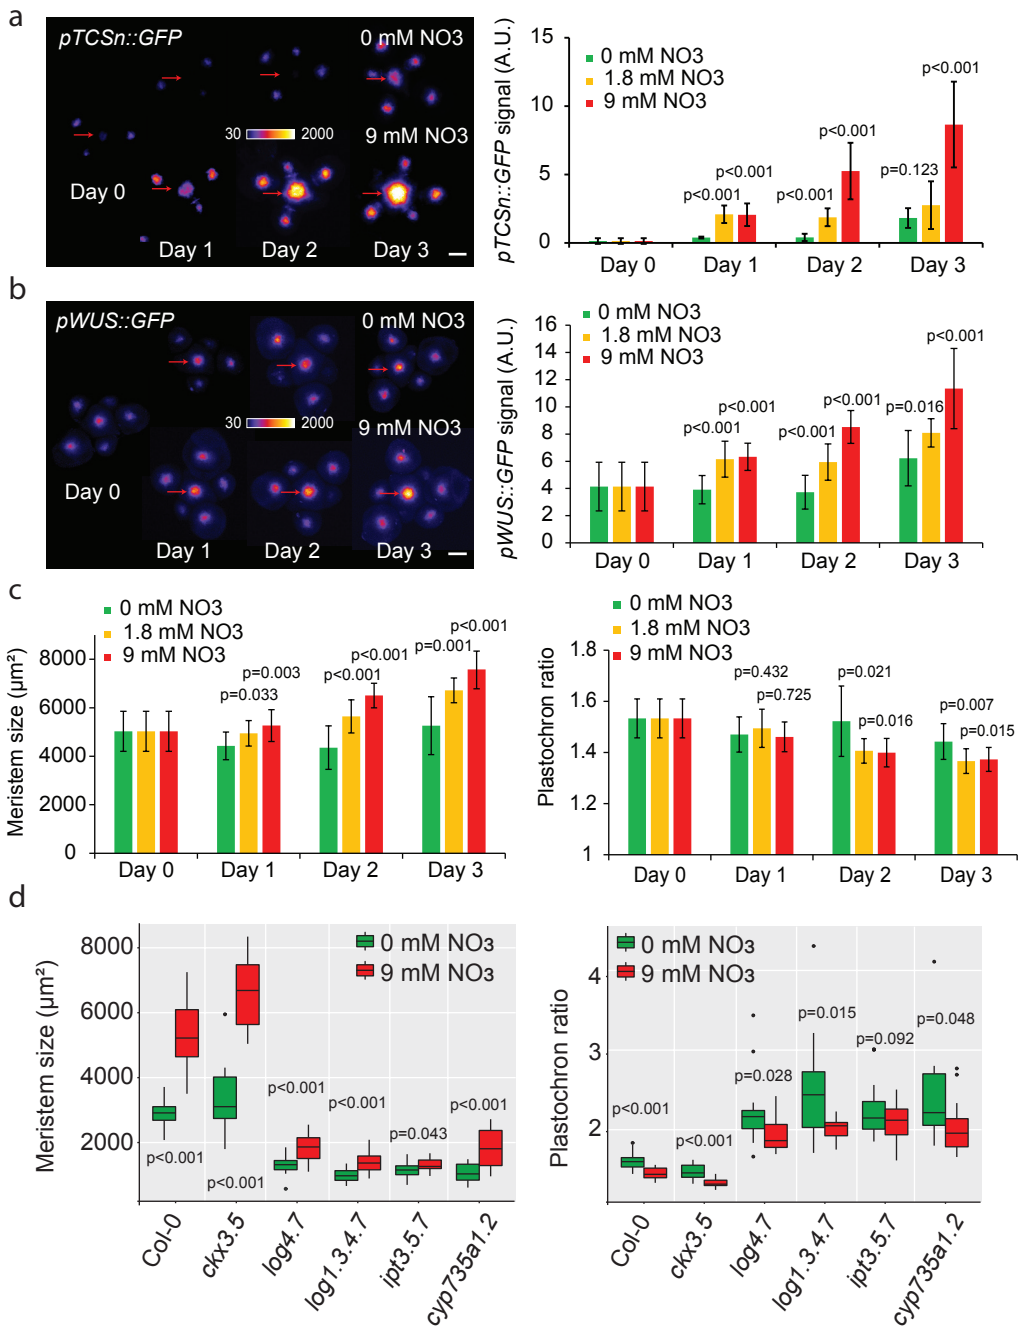

1 **Methods:**

2 **Plant Materials:**

3 Col-0 seeds were provided by the Salk stock center. The *pCLV3::dsRED* and *pWUS::GFP* marker lines  
4 were previously described<sup>1,2</sup>. The *pTCS::GFP* marker was provided by Teva Vernoux<sup>3</sup> and the  
5 *pTCSn::GFP* was provided by Bruno Müller<sup>4</sup>. The *WUS-GFP* marker complementing the *wus* mutant  
6 phenotype was kindly provided by Jan Lohmann<sup>5</sup>. The triple *ipt* mutant *ipt3-1; ipt5-2; ipt7-1 (ipt3.5.7)*  
7 was provided by Ottoline Leyser<sup>6</sup>. The *log4-3; log7-1 (log4.7), log1-2; log3-2; log4-3; log7-1 (log1.3.4.7)*  
8 and *cyp735a1-1; cyp735a2-1 (cyp735a1.2)* mutant seeds were kindly provided by Hitoshi Sakakibara  
9 and the RIKEN Institute<sup>7</sup>. The *ckx3-1 (SAIL\_55\_G12/CS870580); ckx5-2 (Salk\_117512C)* double mutant  
10 has already been described<sup>8</sup> and was generated by Paul Tarr.

11 **Growth conditions:**

12 For all plants grown on soil, batches of seeds were dispersed in pots of soil (Levington F2) and placed  
13 for 3 days in a 4°C room for stratification and then 7 days in a short day room (8h light) for germination.  
14 Seedlings were transferred in to separate pots containing different mixes of sand (Royal Horticultural  
15 Society: Silver Sand) and soil (Levington F2) and put into a constant light room (24 h light, temperature:  
16 22°C, light intensity 160  $\mu\text{mol m}^{-2} \text{s}^{-1}$ ). Plants were watered without or with 1/1/1 fertilizer (Vitafeed  
17 Standard). The experiments were carried out at the beginning of the flowering stage when the main  
18 inflorescence stem was of few centimetres in height.

19 For the nitrate resupply experiment, seedlings were germinated on soil and put in a short day room  
20 (8h light) for 7 days after stratification before being transferred into small individual pots of ½ sand  
21 (Leighton Buzzard sand from WBB Minerals) ½ Terra-green (Oil-Dri) pre-watered with 25 mL of an ATS-  
22 derived (*Arabidopsis* salts medium) nutritive solution containing 1.8 mM of  $\text{NO}_3$  prepared by adjusting  
23 the concentrations of the following components: 0.4 mM  $\text{Ca}(\text{NO}_3)_2$ , 1 mM  $\text{KNO}_3$ , 4 mM KCl and 1.6  
24 mM  $\text{CaCl}_2$ <sup>9,10</sup>. Plants were put for 2 weeks in a short day room (8h light) before being transferred into  
25 a constant light room. Each plant was fed weekly with 10 mL of the same nutrient solution. The  
26 experiments were carried out at the beginning of the flowering stage when the main inflorescence  
27 stem was of few centimetres in height. At the beginning of the experiment (at day 0), plants were  
28 randomized, separated into three populations and watered with 25 mL of the nutritive solution  
29 containing either 0 mM of  $\text{NO}_3$  (by adjusting the concentrations of the following components: 0 mM  
30  $\text{Ca}(\text{NO}_3)_2$ , 0 mM  $\text{KNO}_3$ , 5 mM KCl and 2 mM  $\text{CaCl}_2$ ), 1.8 mM of  $\text{NO}_3$  (same solution as described earlier)  
31 or 9 mM of  $\text{NO}_3$  (normal ATS solution). Each day, 5-10 plants were used for analysis.

32

33 Within the course of the experiments, we realized that the tap water used for watering the plants  
34 contained non-negligible levels of  $\text{NO}_3$  (up to 0.7 mM in the summer), which could have moderately  
35 influenced our measurements and explain some of the differences observed between experimental  
36 repeats. Note however that within an experimental repeat, all genotypes or conditions were grown  
37 simultaneously and experienced the same growth conditions.

38

39 **Generation of the *p35S::XVE-IPT3-TFP* line:**

40 The coding sequence of *IPT3* was amplified from Col-0 cDNA (primers: F:  
41 TTTGGATCCTATGATCATGAAGATATCT-ATGGCTATG and R: AATGAATTCTCGCCACT-AGACACCGCGAC)  
42 and put by conventional cloning into a pENTR1Ad modified vector containing a synthetic sequence for  
43 a GS repeat linker peptide of 30 amino acids identical to the one described in<sup>5</sup>. Then, a LR

44 recombination was performed using the *p35S::XVE-pENTR-R4-L1* plasmid described in<sup>11</sup> and kindly  
45 provided by Ari-Pekka Mähönen, the *pENTR1Ad-IPT3-linker*, *TFP-pENTR-R2-L3* (Turquoise fluorescent  
46 protein) and the *pH7m34GW* destination vector coding for hygromycin resistance. The resulting  
47 plasmid was transformed into *Arabidopsis* plants carrying either both *pTCS::GFP* and *pCLV3::dsRED* or  
48 *pWUS::GFP* by flower dip transformation. Although we could see the effect of inducing *IPT3-TFP* in  
49 multiple independent insertions for each marker, we could only observe a very weak TFP signal by  
50 confocal microscopy.

51

#### 52 **Image acquisition and time-lapse:**

53 Imaging was performed as follows: First, the main inflorescence meristem of plants at the beginning  
54 of the flowering stage was cut one to two centimetres from the tip, dissected under a binocular  
55 stereoscopic microscope to remove all the flowers older than stage 3 (as defined in<sup>12</sup>) and transferred  
56 to a box containing an apex culture medium (ACM) with vitamins as described in<sup>13</sup>. Meristems were  
57 imaged in water using a 20X long-distance water-dipping objective mounted either on a LSM700 or a  
58 LSM780 confocal microscope (Zeiss, Germany). Z-stacks of 1 or 2  $\mu\text{m}$  spacing were taken. In some  
59 experiments, meristems were put in contact with a solution of 0.1 mg/mL of FM4-64 (Thermo-Fisher)  
60 for 10 minutes prior to imaging to dye the cell membranes. For the time-lapse experiment looking at  
61 the effect of extrinsic cytokinin, meristems were put in a box of ACM with vitamins and without or  
62 with 50 $\mu\text{M}$  of tZR or of tZ (Sigma) diluted from 50mM stock solutions. To prepare those stock solutions,  
63 tZR was dissolved in 10mM NaOH and tZ in DMSO. Meristems were kept in a constant light phytotron  
64 and covered with the same solution of liquid ACM for imaging. For the time-lapse experiment looking  
65 at the effect of an estradiol-based induction of *IPT3*, meristems were put in a box of ACM with vitamins  
66 and with 5  $\mu\text{M}$  of  $\beta$ -estradiol (Sigma) or with the equivalent volume of DMSO as a control. Again,  
67 meristems were kept in a constant light phytotron and covered with the same liquid ACM solution for  
68 imaging.

#### 69 **Image Analysis:**

70 Confocal stacks were analysed using the ImageJ software (<https://fiji.sc/>). Z-projections (maximum  
71 intensity) of the stacks were performed to analyse meristems dyed with FM4-64. Z-projections (sum  
72 slices) of the stacks were performed to analyse meristems expressing *GFP* or its derivatives and the  
73 “fire” lookup table was used to represent the signal. Meristem size and plastochron ratio were  
74 measured as described in<sup>14</sup>. Note that as the plastochron ratio is the average area between successive  
75 primordia, this parameter is more variable for meristems producing few organs as it is averaged on a  
76 smaller number of measurements. The expression level of *pTCSn::GFP* and the expression level and  
77 domain size of the *pWUS::GFP*, *WUS-GFP* and *pCLV3::dsRED* were analysed using a Matlab pipeline  
78 (Mathworks Inc., Natick, MA) specifically developed for this study (see below).

#### 79 **Characterization of gene expression domains through automated image analysis:**

80 In order to characterize quantitatively the *WUS-GFP*, *pWUS::GFP*, *pTCSn::GFP* and *pCLV3::dsRED*  
81 domains in meristems, we developed an automatic pipeline with custom-made code written in  
82 Matlab. The code performs two basic tasks: first of all, it automatically identifies the fluorescent  
83 domain in the inflorescence meristem. Second, it computes the size and the intensity of such a  
84 domain. The domain identification is performed on Gaussian filtered ( $\sigma=5\mu\text{m}$ ) maximal intensity  
85 projection of the fluorescence image under study, while the size and intensity of the domain  
86 calculation is performed on a Gaussian filtered ( $\sigma=5\mu\text{m}$ ) sum slices projection. In both tasks, the  
87 Gaussian filter is used to smooth out the fluorescence images so that we neutralize the intracellular

88 localization (ER or nucleus) of the fluorescent markers. This produces a more continuous fluorescence  
89 domain, which facilitates the automated extraction of its main features. Below, we explain in further  
90 detail how this pipeline was structured and used.

91 The automatic identification of the center of *WUS* and *CLV3* expression domains is performed  
92 through an Otsu thresholding over the corresponding z-projected and Gaussian-filtered fluorescence  
93 images. As floral primordia also express the reporters, it is assumed that the expression domain of the  
94 inflorescence meristem is the one that is the closest to the center of each image. Then, the centroid,  
95  $r_0$ , of this domain is found and a circular region  $R$  of radius  $\rho_R=40 \mu\text{m}$  is defined that should contain  
96 the fluorescence domain under study in the meristem. In the cases where the expression domain has  
97 failed to be automatically detected – e.g., in those images where the meristem was not well centered  
98 – we have manually specified the center of the inflorescence meristem.

99 After domain detection, the size of fluorescence domains is determined. To do so, the radially  
100 symmetric decay of the fluorescence in the  $R$  regions of the corresponding z-projected and Gaussian  
101 filtered images is characterized. Specifically, a characteristic length  $L_0$  of such decay in each  $R$  region  
102 is extracted, and we interpret this as the fluorescence characteristic domain size. To extract  $L_0$ , the  
103 mean fluorescence intensity within different concentric subregions within region  $R$  around the  
104 centroid  $r_0$  is computed; the most central subregion is a circle of radius  $d\rho=1 \mu\text{m}$ , and the other  
105 subregions are 39 concentric i-toroids ( $i=1,\dots,39$ ) filling the  $R$  region; the  $i$ -th toroid is defined by those  
106 pixels whose  $(x,y)$  coordinates fulfill the relation  $\rho_i^2 < (x-x_0)^2 + (y-y_0)^2 \leq \rho_{i+1}^2$ ,  $x_0$  and  $y_0$  being the  
107 coordinates of the centroid  $r_0$  and where  $\rho_i=i d\rho$ . Then, the characteristic length  $L_0$  is extracted by fitting  
108 the fluorescence profile to an exponential function of the form <sup>15</sup>

$$109 \quad F(r) = C_0 + C_1 e^{-\left(\frac{r}{L_0}\right)^n}, \quad (1)$$

110 where  $C_0$  corresponds to the mean autofluorescence levels of the sum slices projection,  $C_1$  is the height  
111 of the fluorescent peak, and  $n$  is an exponent accounting for the radial decay of the fluorescent  
112 domain.  $C_0$ ,  $C_1$  and  $n$  are also determined in the fit.

113 The total fluorescence of the selected domains (referred as signal),  $M_R$ , is calculated by

$$114 \quad M_R = \gamma \sum_{i \in R} p_i, \quad (2)$$

115 where  $p_i$  is the pixel intensity levels in the  $i$ -th pixel of the sum slices projection, and  $\gamma$  is the resolution  
116 in microns squares of the image under study. The  $\gamma$  factor corrects the differences in intensity levels  
117 between images that have different resolution. Then, the inferred autofluorescence,  $B_R$ , is subtracted  
118 from the summed fluorescence in the selected domain, so that the intensity used in the analysis reads

$$119 \quad I_R = M_R - B_R, \quad (3)$$

120 where  $B_R=C_0 A_R$ , being  $A_R$  the area of the  $R$  region.

121 We have checked that when fixing the  $n$  exponent as the average exponent for all the meristems in a  
122 given experiment, we obtained equivalent results for the characteristic length and total fluorescence  
123 to the case where the  $n$  exponent was a free parameter.

124 The code can be found following this link: <https://gitlab.com/slucu/teamHJ/pau/RegionsAnalysis>  
125 (v0.1)

126

127 **RNA extraction and qPCR:**

128 Three biological replicates of three roots each were used in each time-point. Roots were quickly  
129 washed in water to remove the sand and terra-green and frozen in liquid nitrogen before being  
130 manually ground. Total RNA was extracted using the RNA plus mini kit (Qiagen). First strand cDNA was  
131 then synthesized using the Transcriptor First strand cDNA kit (v.6 Roche). Real-time quantitative PCR  
132 was performed using double-strand DNA-specific dye SYBR Green (Applied Biosystems) in a  
133 LightCycler 480 II (Roche). positive replicates and one negative (using as template a product of the  
134 cDNA transcription made without the transcriptase) were performed for each reaction. Expression of  
135 *UBQ10*, *NIA1*, *IPT3* and *IPT5* was assessed using the primers described in the following table.  
136 Expression data of *NIA1*, *IPT3* and *IPT5* were obtained by normalizing for each replicate the ½ CT of  
137 the corresponding gene by the one of *UBQ10*.

138

|              |                               |
|--------------|-------------------------------|
| UBQ10-qPCR-F | AACTTTGGTGGTTTGTGTTTGG        |
| UBQ10-qPCR-R | TCGACTTGTCATTAGAAAGAAAGAGATAA |
| NIA1-qPCR-F  | GCACGTTTTCGTTTGCGC            |
| NIA1-qPCR-R  | GATATGACCAACCGCGTCG           |
| IPT3-pPCR-F  | AGACTTCCCTCCAGCGAGAT          |
| IPT3-qPCR-R  | GAGAGTCGTGACTTGCCTGT          |
| IPT5-qPCR-F  | ACCTAGCCACTCGTTTCCG           |
| IPT5-qPCR-R  | TTCGTAAGTGTGCTGGACGG          |

139

140 **Cytokinin analysis by mass spectrometry:**

141 Three replicates of three roots, shoots or inflorescences each were used in each condition. Tissues  
142 were frozen in liquid nitrogen, ground manually and an aliquot of 100 to 400 mg was taken and  
143 weighed. Cytokinins were then extracted and measured by liquid chromatography - mass  
144 spectrometry (LC-MS) following the protocol described in <sup>16</sup>, with the following modifications: the  
145 mass spectrometer was an Applied Biosystems QTrap 6500 system, and the initial mobile phase was  
146 5% acetonitrile in 10 mM ammonium formate (pH3.4).

147 **Grafting:**

148 *Arabidopsis* micro-grafting was performed on 7-day-old seedlings according to the protocol described  
149 in<sup>17</sup>. Grafted seedlings were transferred to soil 7 days after grafting, watered with 1/1/1 fertilizer and  
150 put in a constant light room until bolting stage.

151

152 ***In-situ* Hybridization**

153 Full length *WUS* cDNA was amplified by PCR using specific primers and ligated into a pGEM-T Easy  
154 vector (Promega). Transcription was performed using the DIG RNA labelling kit (Roche). Embedding of  
155 the samples, sectioning (8µm sections) and *in situ* hybridization were performed following the  
156 protocol described in (<http://www.its.caltech.edu/~plantlab/protocols/insitu.pdf>) with the addition  
157 of 4% polyvinyl alcohol (PVA) to the nitro blue tetrazolium-bromochloroindolyl phosphate (NBT-BCIP)  
158 staining solution. Sections were captured with a 20x lens using an Axioimager microscope (Zeiss) with  
159 fully opened diaphragm at 2048 x 2048 picture size. Quantification of the *WUS* expression area was  
160 described previously<sup>18</sup>. The threshold was determined by the mean intensity of the unstained tissue  
161 of the same section minus four standard deviations. Three consecutive sections that showed the  
162 strongest staining signal were analysed per meristem and the expression area was averaged. For



163 *ipt3,5,7* and *cyp735a* the staining signal of two consecutive sections was quantified and averaged,  
164 since the *WUS* signal was only detectable in two sections. Image analysis was performed using the  
165 ImageJ software.

166

## 167 **Statistical analysis**

168 Statistical analyses were performed using either Microsoft Excel or R software ([https://www.R-](https://www.R-project.org)  
169 [project.org](https://www.R-project.org)). Mean or mode values (for boxplots) were shown with error bars corresponding to the  
170 standard deviation for all experiments except for the analysis of the levels of cytokinin species by mass  
171 spectrometry where mean was shown with error bars corresponding to the standard error due to the  
172 low number of experimental repeats. The number of biological repeats (usually the number of  
173 meristems) is displayed in the legend of each figure or within the figure itself. When independent  
174 experiments could not be pooled, one independent experiment was shown in the main figures and  
175 one in the supplementary material. When applicable, data were fitted using either linear or  
176 exponential models depending on the shape of the cloud of points and on the value of the coefficient  
177 of determination  $R^2$  and of the p-value of an F-test on the fit. Within the same experiment, the same  
178 type of fit was used when comparing data from different genotypes. When Student tests were  
179 performed to compare time points and genotypes. The measurements were assumed to have two-  
180 tailed distributions and unequal variances and were considered as significantly different when the p-  
181 value was lower than 0.05.

182

- 183 1 Gruel, J. *et al.* An epidermis-driven mechanism positions and scales stem cell niches in  
184 plants. *Sci Adv* **2**, e1500989, doi:10.1126/sciadv.1500989 (2016).
- 185 2 Jonsson, H. *et al.* Modeling the organization of the WUSCHEL expression domain in the shoot  
186 apical meristem. *Bioinformatics* **21 Suppl 1**, i232-240, doi:10.1093/bioinformatics/bti1036  
187 (2005).
- 188 3 Besnard, F., Rozier, F. & Vernoux, T. The AHP6 cytokinin signaling inhibitor mediates an  
189 auxin-cytokinin crosstalk that regulates the timing of organ initiation at the shoot apical  
190 meristem. *Plant Signal Behav* **9** (2014).
- 191 4 Zurcher, E. *et al.* A robust and sensitive synthetic sensor to monitor the transcriptional  
192 output of the cytokinin signaling network in planta. *Plant Physiol* **161**, 1066-1075,  
193 doi:10.1104/pp.112.211763 (2013).
- 194 5 Daum, G., Medzihradzky, A., Suzaki, T. & Lohmann, J. U. A mechanistic framework for  
195 noncell autonomous stem cell induction in Arabidopsis. *Proc Natl Acad Sci U S A* **111**, 14619-  
196 14624, doi:10.1073/pnas.1406446111 (2014).
- 197 6 Miyawaki, K. *et al.* Roles of Arabidopsis ATP/ADP isopentenyltransferases and tRNA  
198 isopentenyltransferases in cytokinin biosynthesis. *Proc Natl Acad Sci U S A* **103**, 16598-  
199 16603, doi:10.1073/pnas.0603522103 (2006).
- 200 7 Tokunaga, H. *et al.* Arabidopsis lonely guy (LOG) multiple mutants reveal a central role of the  
201 LOG-dependent pathway in cytokinin activation. *Plant J* **69**, 355-365, doi:10.1111/j.1365-  
202 313X.2011.04795.x (2012).
- 203 8 Melnyk, C. W., Schuster, C., Leyser, O. & Meyerowitz, E. M. A Developmental Framework for  
204 Graft Formation and Vascular Reconnection in Arabidopsis thaliana. *Curr Biol* **25**, 1306-1318,  
205 doi:10.1016/j.cub.2015.03.032 (2015).
- 206 9 Wilson, A. K., Pickett, F. B., Turner, J. C. & Estelle, M. A dominant mutation in Arabidopsis  
207 confers resistance to auxin, ethylene and abscisic acid. *Mol Gen Genet* **222**, 377-383 (1990).
- 208 10 Muller, D. *et al.* Cytokinin is required for escape but not release from auxin mediated apical  
209 dominance. *Plant J* **82**, 874-886, doi:10.1111/tbj.12862 (2015).

- 210 11 Siligato, R. *et al.* MultiSite Gateway-Compatible Cell Type-Specific Gene-Inducible System for  
211 Plants. *Plant Physiol* **170**, 627-641, doi:10.1104/pp.15.01246 (2016).
- 212 12 Smyth, D. R., Bowman, J. L. & Meyerowitz, E. M. Early flower development in Arabidopsis.  
213 *Plant Cell* **2**, 755-767, doi:10.1105/tpc.2.8.755 (1990).
- 214 13 Fernandez, R. *et al.* Imaging plant growth in 4D: robust tissue reconstruction and lineaging at  
215 cell resolution. *Nat Methods* **7**, 547-553, doi:10.1038/nmeth.1472 (2010).
- 216 14 Landrein, B. *et al.* Meristem size contributes to the robustness of phyllotaxis in Arabidopsis. *J*  
217 *Exp Bot* **66**, 1317-1324, doi:10.1093/jxb/eru482 (2015).
- 218 15 Bergmann, S. *et al.* Pre-steady-state decoding of the Bicoid morphogen gradient. *PLoS Biol* **5**,  
219 e46, doi:10.1371/journal.pbio.0050046 (2007).
- 220 16 Young, N. F. *et al.* Conditional Auxin Response and Differential Cytokinin Profiles in Shoot  
221 Branching Mutants. *Plant Physiol* **165**, 1723-1736, doi:10.1104/pp.114.239996 (2014).
- 222 17 Melnyk, C. W. Grafting with Arabidopsis thaliana. *Methods Mol Biol* **1497**, 9-18,  
223 doi:10.1007/978-1-4939-6469-7\_2 (2017).
- 224 18 Geier, F. *et al.* A quantitative and dynamic model for plant stem cell regulation. *PLoS One* **3**,  
225 e3553, doi:10.1371/journal.pone.0003553 (2008).
- 226
